# Supplementary material for: Assessing the impacts of reservoirs on downstream flood frequency by coupling the effect of scheduling-related multivariate rainfall with an indicator of reservoir effects
Source: Copernicus journal article supplement (doi:10.5194/hess-23-4453-2019), 2019-10-30
Supplement: Supplementary file 1 [file hess-23-4453-2019-supplement.pdf]

Supplement of Hydrol. Earth Syst. Sci., 23, 4453–4470, 2019  
<https://doi.org/10.5194/hess-23-4453-2019-supplement>  
© Author(s) 2019. This work is distributed under  
the Creative Commons Attribution 4.0 License.

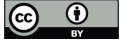

*Supplement of*

**Assessing the impacts of reservoirs on downstream flood frequency  
by coupling the effect of scheduling-related multivariate rainfall  
with an indicator of reservoir effects**

**Bin Xiong et al.**

*Correspondence to:* Lihua Xiong (xionglh@whu.edu.cn)

The copyright of individual parts of the supplement might differ from the CC BY 4.0 License.

## Supplementary Information

### Estimation of the loss rate (%) of reservoir capacity

To estimate the variation of  $LR_i$  over time, it is assumed that there is the same amount of sediment in each year. Then,  $LR_i$  is estimated by

$$LR_i = \frac{n_i \cdot L_i^m}{RC_i} = \frac{n_i \cdot w_i^s \cdot Te_i}{\rho \cdot RC_i} \quad (S1)$$

where  $n_i$  is the number of years which the  $i$ -th reservoir has been used,  $L_i^m$  is the mean of annual loss of reservoir capacity ( $m^3$ ) for the  $i$ -th reservoir,  $w_i^s$  is the mean of annual inflow sediment mass (kg) for the  $i$ -th reservoir,  $\rho$  is the density of the deposited sediment ( $kg/m^3$ ) and  $Te_i$  is the trap efficiency (%). Based on the Brune method (Brune, 1953; Mulu and Dwarakish, 2015), the trap efficiency is estimated with reservoir capacity-inflow ratio as follows

$$Te_i = 1 - \frac{0.5}{\sqrt{RC_i/I_i^m}} \quad (S2)$$

where  $I_i^m$  is the mean of annual inflow volume in the  $i$ -th reservoir ( $m^3/day$ ). The data in the previous literature (Guo, 1995; Hu, 2009; Liu, 2017) are collected to control the estimation errors of  $L_i^m$ . Please see Table S1.

### Reference:

- Hu, A. Y.: Analysis of sedimentation characteristics of Danjiangkou Reservoir, Research in Soil and Water Conservation, 16, 237-240, 2009. (In Chinese)
- Brune, G. M.: Trap efficiency of reservoirs, Transactions American Geophysical Union, 34, 407-418, 1953.
- Guo, J. M.: Analysis of sedimentation in Ankang Reservoir and its impact on the reservoir operation, Northwest Hydropower, 1995, 9-12, 1995. (In Chinese)
- Liu, J. X.: Sedimentation characteristic analysis and desilting scheme optimization of Shiquan Reservoir, Pearl River, 38, 56-59, 2017. (In Chinese)
- Mulu, A., and Dwarakish G. S.: Different approach for using trap efficiency for estimation of reservoir sedimentation, An Overview. Aquatic Procedia, 4, 847-852, 2015.

**Table S1.** Summary for the calculation of the mean of annual loss of reservoir capacity

| Reservoirs   | $RC_i$<br>( $10^9 \text{ m}^3$ ) | $I_i^m$<br>( $10^9 \text{ m}^3$ ) | $w_i^s$<br>( $10^9 \text{ kg}$ ) | $Te_i$<br>(%) | $L_i^m$ ( $10^9 \text{ m}^3$ ) |               |
|--------------|----------------------------------|-----------------------------------|----------------------------------|---------------|--------------------------------|---------------|
|              |                                  |                                   |                                  |               | From previous studies          | From Eq.(S2)* |
| Shiquan      | 0.566                            | 11.73                             | 12.6                             | 88%           | 0.006                          | 0.008         |
| Ankang       | 3.21                             | 19.17                             | 27.1                             | 94%           | -                              | 0.018         |
| Huanglongtan | 1.17                             | 6.12                              | 8.58                             | 94%           | 0.007                          | 0.006         |
| Dangjiangkou | 34.0                             | 39.48                             | 59.8                             | 97%           | 0.044                          | 0.042         |
| Yahekou      | 1.32                             | 1.09                              | -                                | 98%           | 0.007                          | -             |

\*  $\rho = 1400 \text{ kg/m}^3$

**Table S2.** Results of the change-point detection for the four MARI variables.

| Variables | AK           |              | HJG          |              | HZ           |         |
|-----------|--------------|--------------|--------------|--------------|--------------|---------|
|           | change-point | p-value*     | change-point | p-value      | change-point | p-value |
| <i>M</i>  | 1976         | 1.037        | 1989         | 0.371        | 1971         | 1.278   |
| <i>I</i>  | 1987         | <b>0.031</b> | 1985         | <b>0.009</b> | 1990         | 0.080   |
| <i>V</i>  | 2009         | 0.746        | 1984         | <b>0.042</b> | 1984         | 0.769   |
| <i>T</i>  | 1992         | 1.180        | 1984         | 0.986        | 1984         | 1.367   |

\*Less than 0.05 is considered significant.

**Figure S1.** Interannual variation of loss rate of reservoir capacity for each reservoir in the study area.

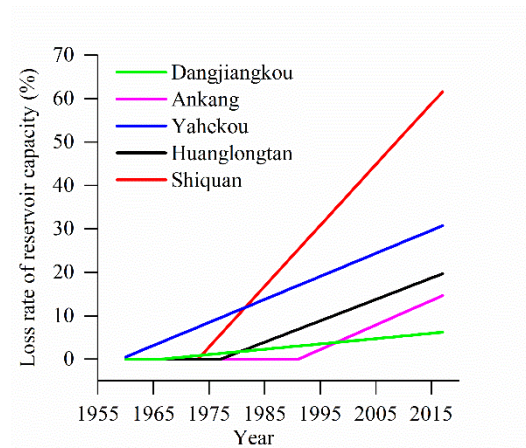

**Figure S2.** Impact of reservoir capacity loss on RI for AK, HJG and HZ stations.

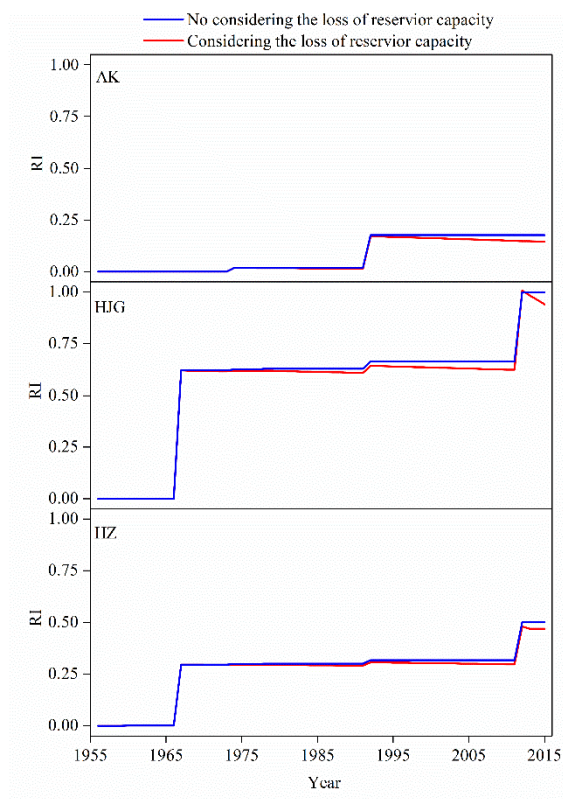

**Figure S3.** Preliminary analysis of the snowmelt influences on the streamflow in the catchment upstream the AK station. (a) is the total number of times for AMDF in each month; (b) is the monthly average temperature; (c) is the monthly average streamflow; and (d) is the monthly average precipitation.

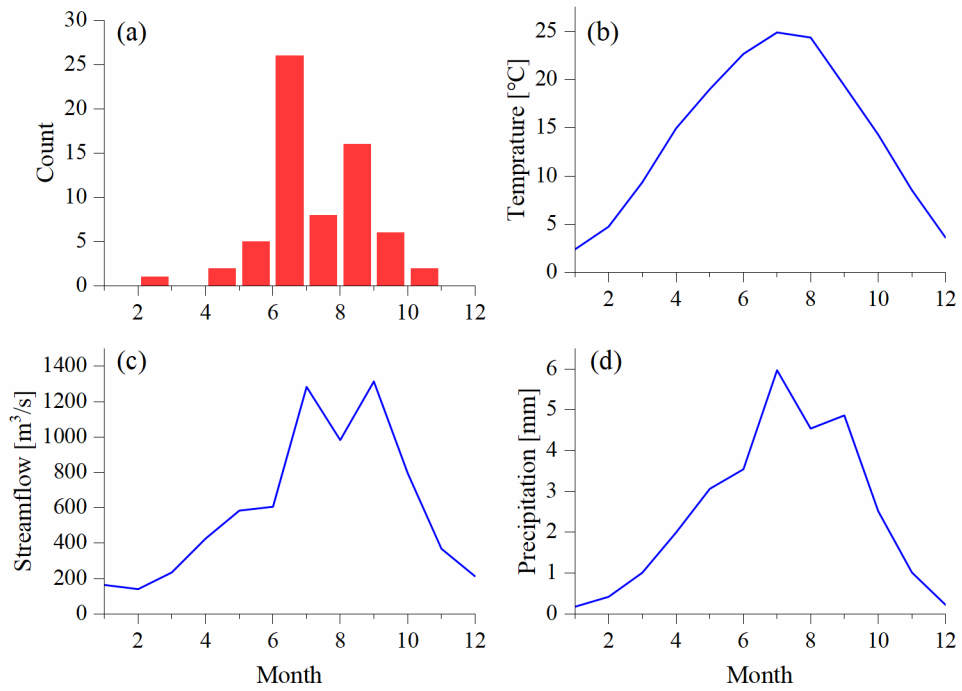

## **Glossary and Notation:**

$\alpha_0, \alpha_1, \beta_0, \beta_1$  : parameters of nonstationary model.

$A_i$  : total basin area upstream of the  $i$ -th reservoir.

$A_r$  : total basin area upstream of the gauge station.

AIC: Akaike information criterion.

AK: Ankang (gauging station).

AMDF: annual maximum daily flow (series).

CDF: Cumulative distribution function

$d$  : dimension of copulas.

df : freedom degree.

GA: Gamma distribution

GEV: Generalized Extreme Value distribution.

GEV\_S23: nonstationary GEV distribution with the S23 scenario.

GML: generalized maximum likelihood (method).

GU: Gumbel distribution.

HJG: Huangjiagang (gauging station).

HZ: Huang zhuang (gauging station).

$I$  : intensity, the mean of daily rainfall in MARI.

IDW: Inverse distance weighting method.

IRI: impounded runoff index, a ratio of reservoir capacity to mean annual runoff.

$\hat{l}$  : maximized likelihood of the model object.

$L$  : distance, the distance between the rainfall center and the outlet.

LOGNO: Lognormal distribution.

$LR_i$  : loss rate (%) of total storage capacity of the  $i$ -th reservoir due to the sediment deposition.

$\mu_r$  : mu parameter of the distribution functions used.

$M_c$  : length of the Markov chain.

$M$  : maximum, the maximum of daily rainfall in MARI.

MARI: multiday antecedent rainfall input.

MCMC: Markov chain Monte Carlo.

ML: maximum likelihood (method).

$n$  : number of data points.

$N$  : total number of reservoirs upstream of the gauge station.



OR-JEP: OR-joint exceedance probability.

$P_{\text{MARI}}^{\vee}$  : OR-joint exceedance probability.

$\theta_i$  : parameter vector of the  $i$ -th marginal distribution.

$\theta_c$  : copula parameter vector.

$\theta$  : parameter vector of the whole  $n$ -dimensional distribution.

$\theta_{\text{GEV\_S23}}$  : parameters of the GEV\_S23 model.

$\hat{\theta}_{\text{GEV\_S23}}^i$  : an estimation for the parameters of the GEV\_S23 model.

$\bar{Q}$  : mean annual runoff.

RRCI: rainfall-reservoir composite index.

RI: reservoir index.

RC: reservoir capacity.

$\text{RC}_i$  : total storage capacity of the  $i$ -th reservoir.

$\sigma_i$  : sigma parameter of the distribution functions used.

S0: constant scenario.

S1: RI-dependent scenarios.

S2: RRCI-dependent scenarios.

SBC: Schwarz Bayesian criterion.

$T$  : timing, the end time of MARI in the year.

$u_i$  : univariate marginal distribution of  $X_i$ .

$V$  : volume, the total of daily rainfall in MARI.

WEI: Weibull distribution.

$\xi$  : shape parameter of the Generalized Extreme Value distribution.

$X_1, X_2, \dots, X_d$  : scheduling-related MARI variables.
